# Supplementary material for: Integrated care for older people based on information and communication technology: a scoping review protocol
Source: HighWire-hosted journal article supplement (doi:10.1136/bmjopen-2022-061011), 2022-07-01
Supplement: bmjopen-2022-061011supp001_data_supplement.pdf [file bmjopen-2022-061011supp001_data_supplement.pdf]

## Initial Search Results for PubMed Database

### Keywords / Terms

| Main Headings                       | Entry Terms                                                                                                                                                                                                                                                         |
|-------------------------------------|---------------------------------------------------------------------------------------------------------------------------------------------------------------------------------------------------------------------------------------------------------------------|
| Information Technology              | information and communication technology,<br>ICT,<br>digital,<br>tele*,<br>internet,<br>mobile,<br>cloud,<br>eHealth<br>virtual care                                                                                                                                |
| Delivery of Health Care, Integrated | integrated care,<br>integrated health system(s),<br>coordinated care,<br>comprehensive care,<br>seamless care,<br>transmural care,<br>multidisciplinary care,<br>holistic care,<br>joint care,<br>person- centred care<br>interprofessional care<br>team-based care |
| Aged                                | old people,<br>senior citizen,<br>elderly,<br>elder,<br>geriatric                                                                                                                                                                                                   |

**Search Strategy:**

((((((((((Information Technology[MeSH Terms]) OR (information and communication technology[Title/Abstract])) OR (ICT[Title/Abstract])) OR (digital[Title/Abstract])) OR (tele\*[Title/Abstract])) OR (internet[Title/Abstract])) OR (mobile[Title/Abstract])) OR (cloud[Title/Abstract])) OR (eHealth[Title/Abstract])) OR (virtual care[Title/Abstract])) AND (((((Aged[MeSH Terms]) OR (old people[Title/Abstract])) OR (senior citizen[Title/Abstract])) OR (elderly[Title/Abstract])) OR (elder[Title/Abstract])) OR (geriatric[Title/Abstract])) AND (((((((((((Delivery of Health Care, Integrated[MeSH Terms]) OR (integrated care[Title/Abstract])) OR (integrated health system(s[Title/Abstract])) OR (coordinated care[Title/Abstract])) OR (comprehensive care[Title/Abstract])) OR (seamless care[Title/Abstract])) OR (transmural care[Title/Abstract])) OR (multidisciplinary care[Title/Abstract])) OR (holistic care[Title/Abstract])) OR (joint care[Title/Abstract])) OR (person- centred care[Title/Abstract])) OR (interprofessional care[Title/Abstract])) OR (team-based care[Title/Abstract]))

**Initial Search Results**

We conducted an initial search in the PubMed database using the search strategy described above and retrieved a total of 603 publications.
